# Supplementary material for: MMP-9 and IL-1β as Targets for Diatoxanthin and Related Microalgal Pigments: Potential Chemopreventive and Photoprotective Agents
Source: MDPI journal article supplement (doi:10.3390/md19070354), 2021-06-22
Supplement: s1 [file s1]

|                    |                                                                                     |                            |                                                                                       |
|--------------------|-------------------------------------------------------------------------------------|----------------------------|---------------------------------------------------------------------------------------|
| Alloxanthin        | 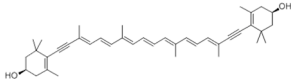   | 19'butayloxy-fucoxanthin   |    |
| Antheraxanthin     |    | 19'hexanoyloxy-fucoxanthin |     |
| Astaxanthin        |    | Lutein                     |     |
| $\alpha$ -carotene |    | Lycopene                   |     |
| $\beta$ -carotene  |    | Myxoxanthophyll            |     |
| Chlorophyll c3     |   | Neoxanthin                 |   |
| Diadinoxanthin     |  | Peridinin                  |   |
| Diatoxanthin       |  | Prasinoxanthin             |  |
| Echinenone         |  | Violaxanthin               |   |
| Fucoxanthin        |  | Zeaxanthin                 |   |
