# Supplementary figures and images for: MMP-9 and IL-1β as Targets for Diatoxanthin and Related Microalgal Pigments: Potential Chemopreventive and Photoprotective Agents
Source: MDPI journal article supplement (doi:10.3390/md19070354), 2021-06-22

Additional file 1

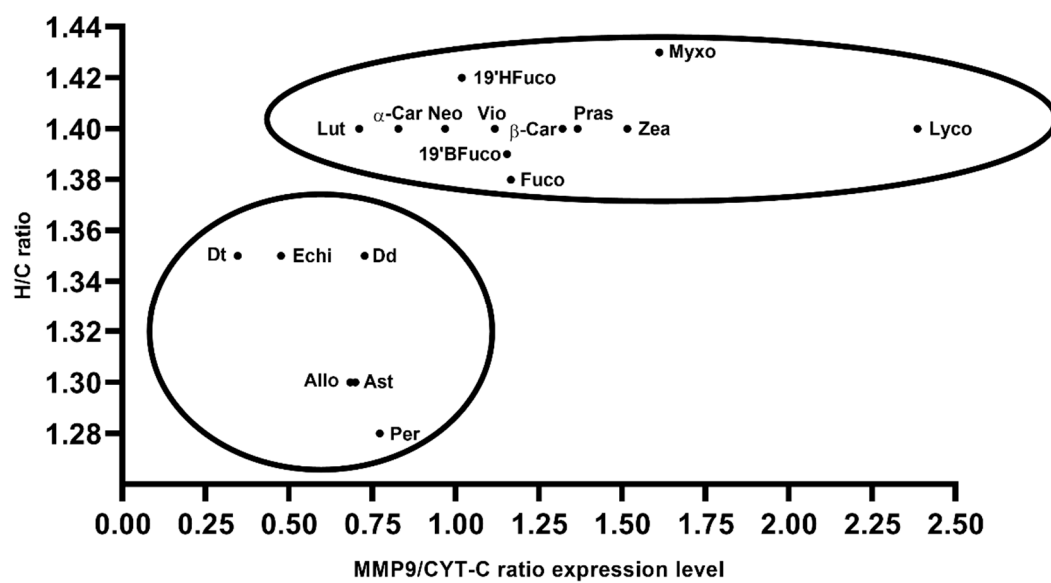

Supplement: s1 [file s1]

### Additional file 3

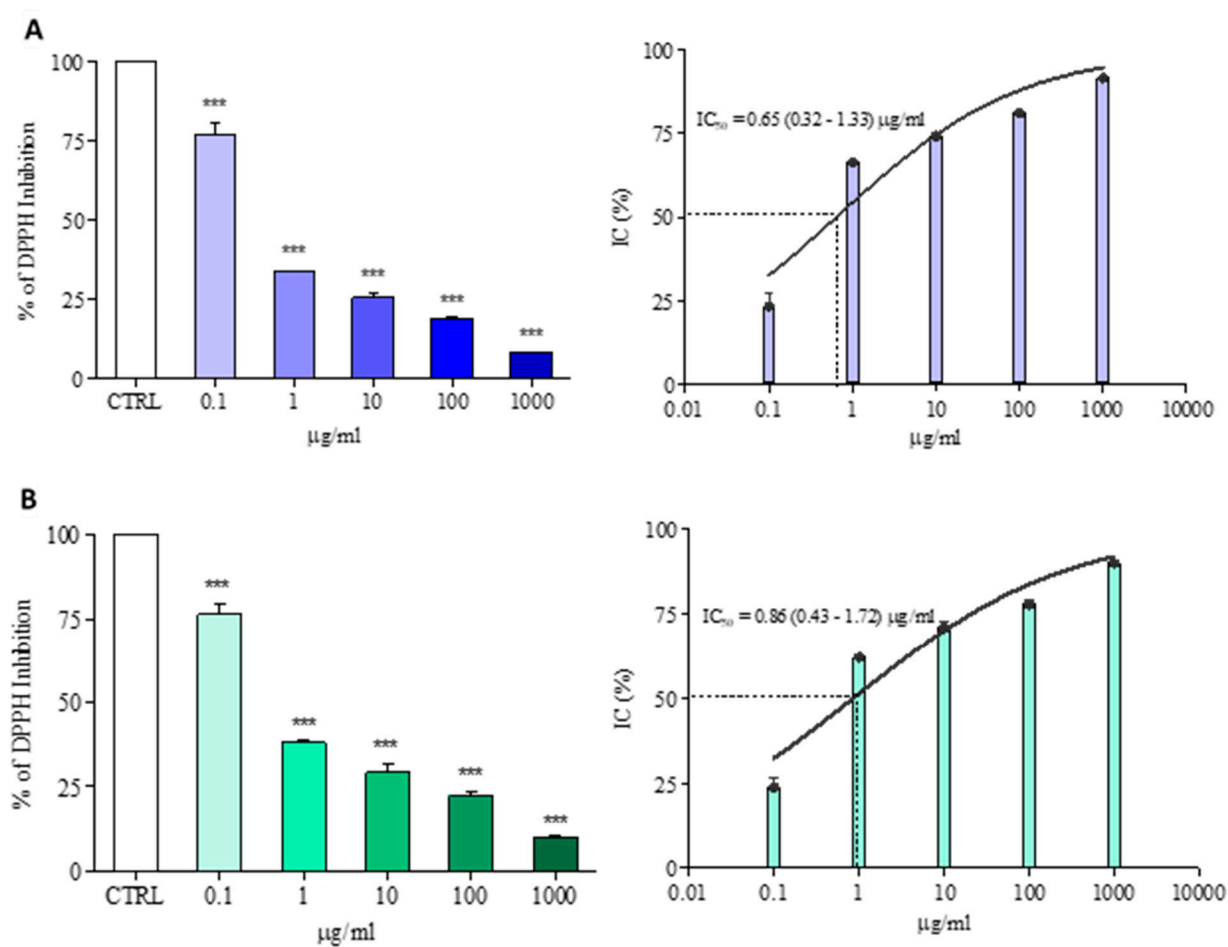

Supplement: s1 [file s1]
